# Supplementary material
Source: PubMed Central journal article supplement (PMC4787874)
Supplement: ellp727370.ww1_default.pdf [file ellp727370.ww1_default.pdf]

**Table A. Descriptive statistics for socio-demographic measures for cases and controls by cause [posted as supplied by author]**

|                                    |                   | Carstairs index <sup>†</sup> |          | Percent with Degree Level Education <sup>†</sup> |          | Population Density (per 1000 m <sup>2</sup> ) <sup>†</sup> |          | Percent Inward Migration <sup>†</sup> |          |
|------------------------------------|-------------------|------------------------------|----------|--------------------------------------------------|----------|------------------------------------------------------------|----------|---------------------------------------|----------|
|                                    |                   | Mean (SD)                    | <i>p</i> | Mean (SD)                                        | <i>p</i> | Mean (SD)                                                  | <i>p</i> |                                       | <i>p</i> |
| All cancers                        | Cases (n=1397)    | 0.24 (3.4)                   | 0.14     | 18.8 (13.0)                                      | 0.19     | 5.7 (6.1)                                                  | 0.08     | 10.8 (6.6)                            | 0.75     |
|                                    | Controls (n=5588) | 0.39 (3.4)                   |          | 18.3 (12.8)                                      |          | 6.0 (6.8)                                                  |          | 10.8 (6.7)                            |          |
| Brain and CNS                      | Cases (n=251)     | 0.33 (3.5)                   | 0.82     | 18.7 (12.9)                                      | 0.63     | 6.0 (6.0)                                                  | 0.68     | 10.9 (6.6)                            | 0.92     |
|                                    | Controls (n=1004) | 0.39 (3.3)                   |          | 18.2 (12.4)                                      |          | 6.2 (5.8)                                                  |          | 10.9 (6.9)                            |          |
| Leukaemia and Non-Hodgkin lymphoma | Cases (n=527)     | 0.22 (3.4)                   | 0.22     | 19.2 (13.4)                                      | 0.10     | 5.7 (5.4)                                                  | 0.29     | 10.4 (6.0)                            | 0.20     |
|                                    | Controls (n=2108) | 0.43 (3.4)                   |          | 18.1 (12.8)                                      |          | 5.9 (5.6)                                                  |          | 10.8 (6.7)                            |          |

<sup>†</sup> Data from 2001 census at Output Area level
