# Supplementary material
Source: PubMed Central journal article supplement (PMC4787874)
Supplement: ellp727370.ww2_default.pdf [file ellp727370.ww2_default.pdf]

**Table B. Correlations (Spearman's) between exposure metrics and socio-demographic indicators [posted as supplied by author]**

|                          | Distance from<br>Nearest Base<br>Station | Total Power<br>Output | Modelled Power<br>Density | Carstairs<br>Index | % Degree<br>Level<br>Education | Population<br>Density |
|--------------------------|------------------------------------------|-----------------------|---------------------------|--------------------|--------------------------------|-----------------------|
| Total Power Output       | -0.82                                    |                       |                           |                    |                                |                       |
| Modelled Power Density   | -0.74                                    | 0.62                  |                           |                    |                                |                       |
| Carstairs Index          | -0.26                                    | 0.24                  | 0.22                      |                    |                                |                       |
| % Degree Level Education | -0.05                                    | 0.10                  | 0.08                      | -0.54              |                                |                       |
| Population Density       | -0.36                                    | 0.32                  | 0.31                      | 0.45               | -0.10                          |                       |
| % Inward Migration       | -0.13                                    | 0.15                  | 0.13                      | 0.13               | 0.18                           | 0.15                  |
