# Supplementary material
Source: PubMed Central journal article supplement (PMC4787874)
Supplement: ellp727370.ww3_default.pdf [file ellp727370.ww3_default.pdf]

**Table C. Mean (Standard Deviation) distance to nearest Radio and TV masts for cases and controls in England and Wales [posted as supplied by author]**

|                                        |                   | FM            |          | VHF         |          | TV          |          |
|----------------------------------------|-------------------|---------------|----------|-------------|----------|-------------|----------|
|                                        |                   | Mean (SD)     | <i>p</i> | Mean (SD)   | <i>p</i> | Mean (SD)   | <i>p</i> |
| Mean distance to mast for cases (m)    | Cases (n=1288)    | 20410 (14370) | 0.75     | 8045 (6187) | 0.96     | 7489 (6680) | 0.83     |
| Mean distance to mast for controls (m) | Controls (n=4753) | 20556 (14503) |          | 8036 (5883) |          | 7446 (6418) |          |
