# Supplementary material
Source: PubMed Central journal article supplement (PMC4787874)

**Figure A. Scattergrams showing relationships between measured and modelled total power density (dBm) for rural antennae (a) and sites (b) at Bowes and urban antennae (c) and sites (d) at Cheltenham [posted as supplied by author]**

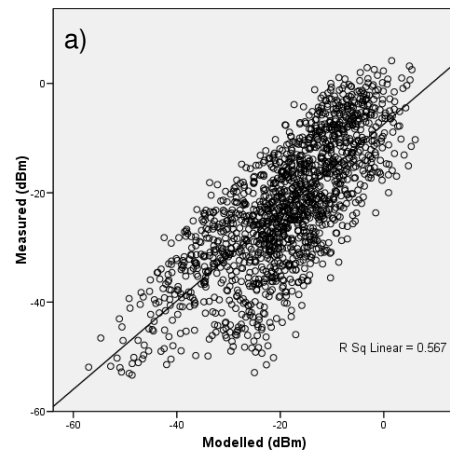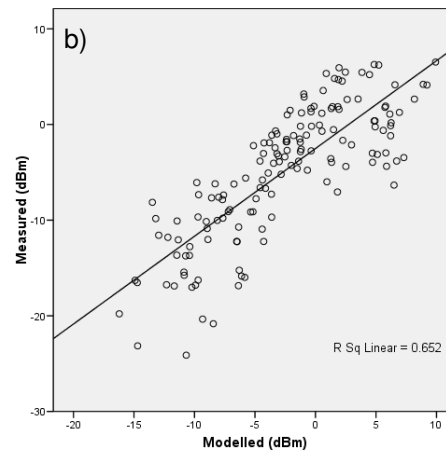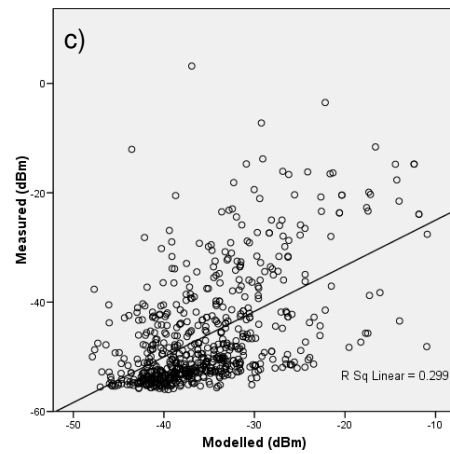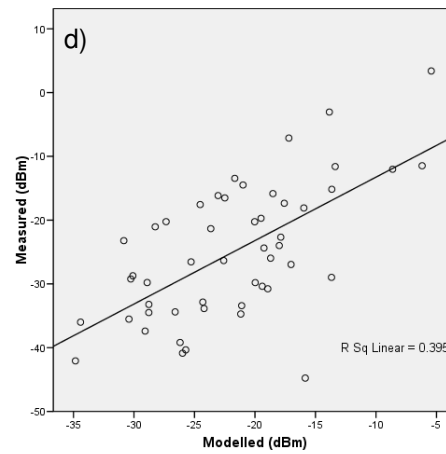

Supplement: ellp727370.ww4_default.pdf [file ellp727370.ww4_default.pdf]
