# Supplementary material
Source: PubMed Central journal article supplement (PMC4787874)
Supplement: ellp727370.ww5_default.pdf [file ellp727370.ww5_default.pdf]

Figure B. Boxplots of measured power density at 620 test sites for the three exposure metrics, and histogram of measured power density at the test sites [posted as supplied by author]

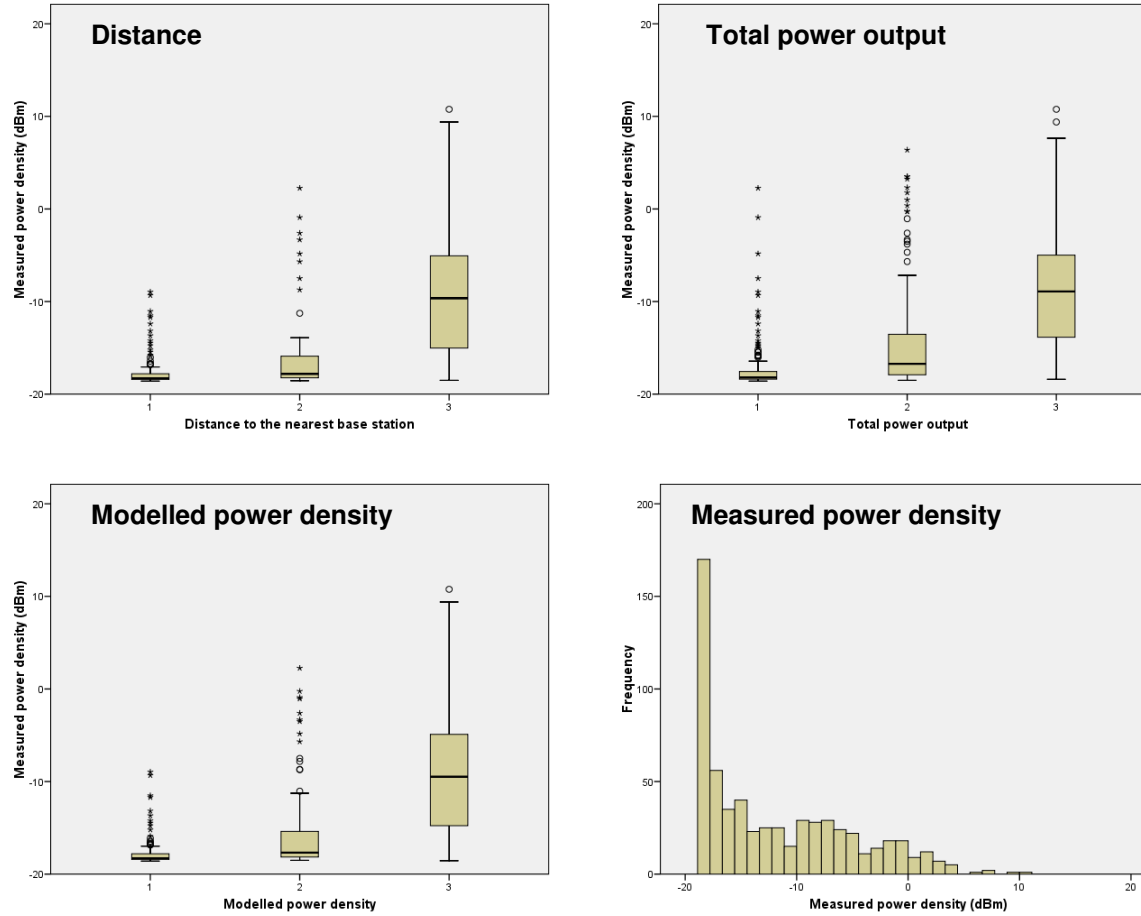

Categories: Distance (m): **1** =  $\geq 1071.8$  ; **2** = 612.1-1071.7; **3** = 0-612  
 Total power output (kW): **1** = 0; **2** = 0.001-4.742; **3** =  $\geq 4.743$   
 Modelled power density (dBm): 1= -70--26.4659, 2= -26.4658--17.6966; 3=  $\geq -17.6965$   
 (equivalent to 1= 0-0.002256, 2=0.002257-0.016996, 3=  $\geq 0.016997$  in mW/m<sup>2</sup>).
